# Supplementary material for: A programmable method for massively parallel targeted sequencing
Source: PubMed Central journal article supplement (PMC4041455; doi:10.1093/nar/gku282), 2014-04-29

Supplementary Figure S1

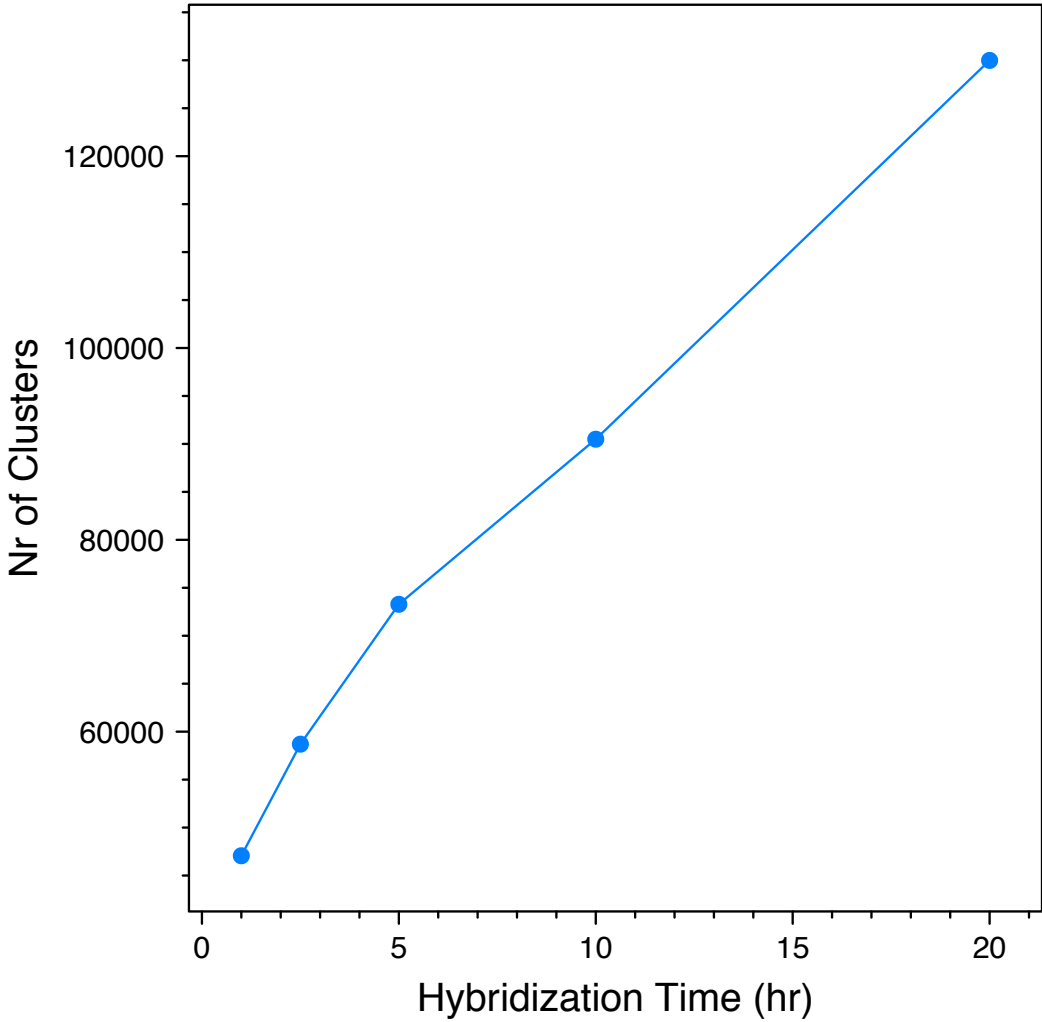

# Supplementary Figure S2

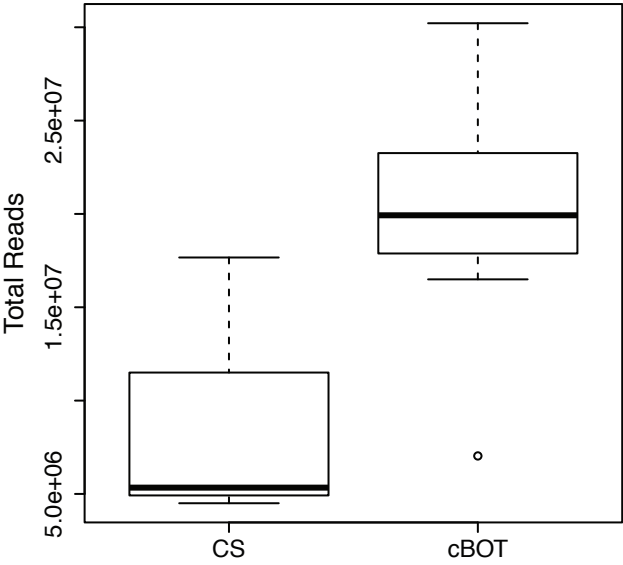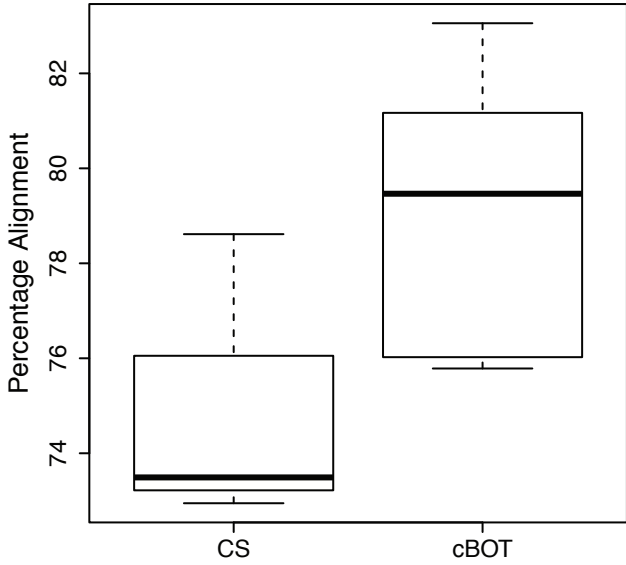

Supplement: supp_gku282_nar-00250-met-k-2014-File006.pdf [file supp_gku282_nar-00250-met-k-2014-File006.pdf]
